# Supplementary material
Source: PubMed Central journal article supplement (PMC4521308)
Supplement: ja20154x1.pdf [file ja20154x1.pdf]

## Supplementary Information

### A New Antibiotic with Potent Activity Targets MscL

*Irene Iscla<sup>1</sup>, Robin Wray<sup>1</sup>, Paul Blount<sup>1\*</sup>, Jonah Larkins-Ford<sup>2</sup>, Annie L Conery<sup>2</sup>,  
Frederick M Ausubel<sup>2</sup>, Soumya Ramu<sup>3</sup>, Angela Kavanagh<sup>3</sup>, Johnny X Huang<sup>3</sup>,  
Mark A Blaskovich<sup>3</sup>, Matthew A Cooper<sup>3</sup>, Andres Obregon-Henao<sup>4</sup>, Ian Orme<sup>4</sup>,  
Edwin S Tjandra<sup>5</sup>, Uwe H Stroehler<sup>6</sup>, Melissa H Brown<sup>6</sup>, Cindy Macardle<sup>7</sup>, Nick van Holst<sup>7</sup>,  
Chee Ling Tong<sup>8</sup>, Ashley D Slattery<sup>8</sup>, Christopher T Gibson<sup>8</sup>, Colin L Raston<sup>8</sup>  
and Ramiz A Boulos<sup>8\*</sup>*

<sup>1</sup> Department of Physiology, UT Southwestern Med Ctr, 5323 Harry Hines Blvd, Dallas,  
TX 75390-9040.

Paul.blount@UTSouthwestern.edu

<sup>2</sup> Department of Molecular Biology, Massachusetts General Hospital, Simches CPZN7808,  
185 Cambridge St, Boston, MA 02114

<sup>3</sup> Institute for Molecular Bioscience, University of Queensland, St Lucia, Qld 4072, Australia.

<sup>4</sup> Department of Microbiology, Immunology, and Pathology, Colorado State University, Fort  
Collins, CO 80523-1682.

<sup>5</sup> School of Animal Biology, The University of Western Australia, Crawley, WA 6009  
Australia.

<sup>6</sup> School of Biological Sciences, Flinders University, Bedford Park, SA 5042 Australia.

<sup>7</sup> Flinders Medical Science and Technology, Immunology, Allergy and Arthritis, Flinders  
University, Bedford Park, SA 5042 Australia.

<sup>8</sup> Centre for NanoScale Science and Technology, School of Chemical and Physical Sciences,  
Flinders University, Bedford Park, SA. 5042 Australia.

ramiz.boulos@flinders.edu.au

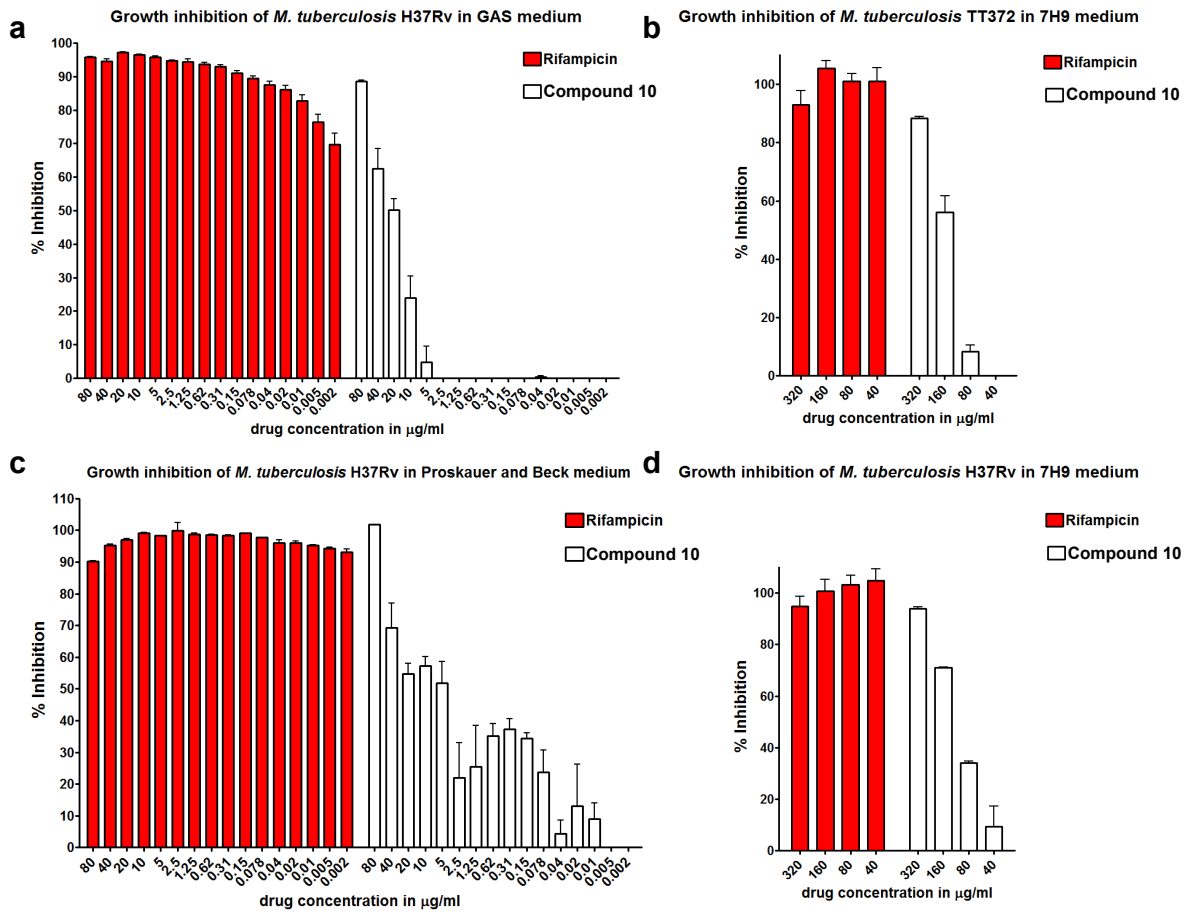

**Fig. S1** | Comparison of efficacy of **10** and Rifampicin against multi-drug resistance *M. tuberculosis* H37RV (a, c and d) and TT372 strains (b). The 7H9 medium contains OADC (oleic acid, albumin, dextrose and catalase), which is needed for the growth of the bacteria. GAS medium has a final pH of 6.6 and the Proskauer and Beck medium has a final pH of 7.4.

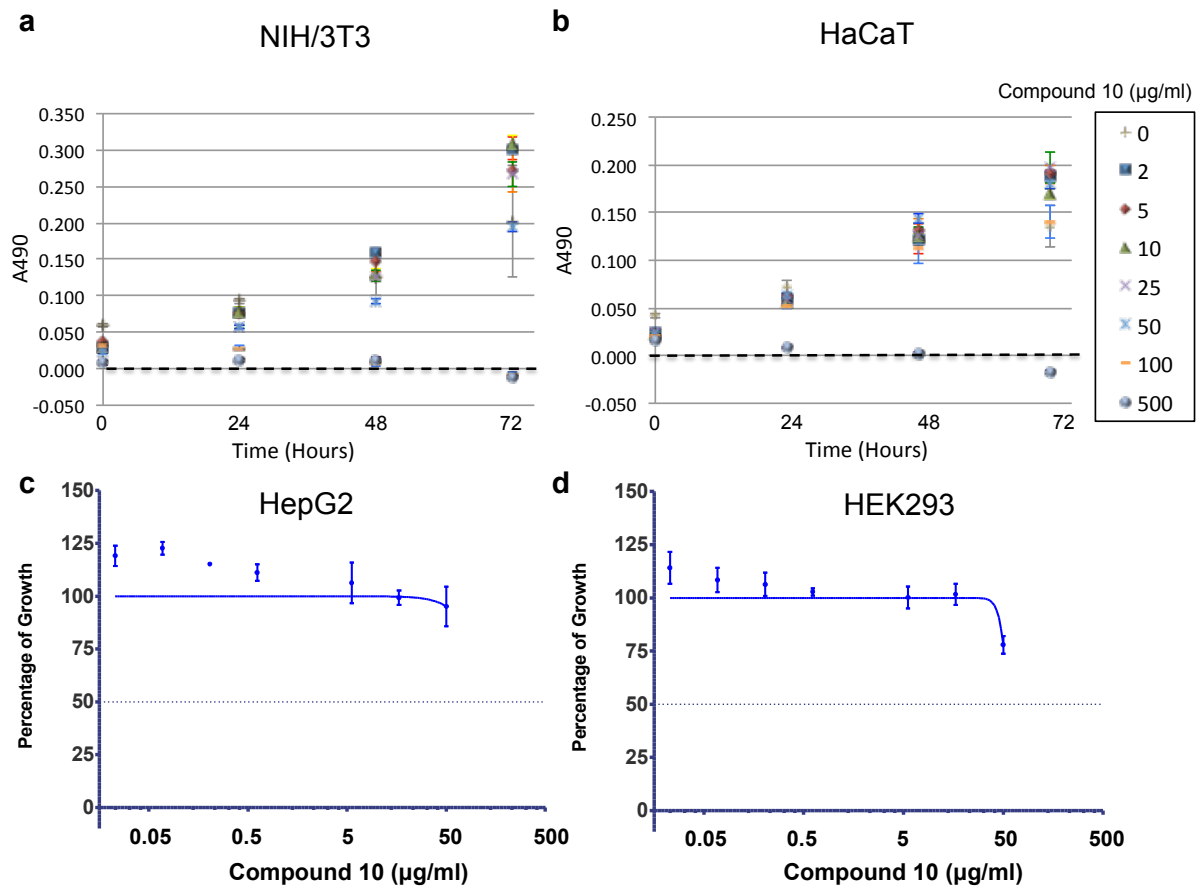

**Fig. S2** | Cytotoxicity studies of Ramizol<sup>®</sup>. (a) Cytotoxicity in NIH/3T3 fibroblasts and (b) immortalised keratinocytes (HaCaT). (c) Cytotoxicity in hepatocellular carcinoma (HepG2 ATCC HB-8065) and (d) human embryonic kidney cells (HEK293 ATCC CRL-1573). Statistical differences in cell viability were observed between NIH/3T3 fibroblasts in the presence of **10** at 2 µg/mL and 500 µg/mL after 72 hrs compared to the control ( $p=0.0256$ ,  $n=3$  Student *t*-test). Statistical differences were observed between HaCaT cells in the presence of **10** at 500 µg/mL after 72 hrs compared to the control ( $p=0.0256$ ,  $n=3$  Student *t*-test unpaired).

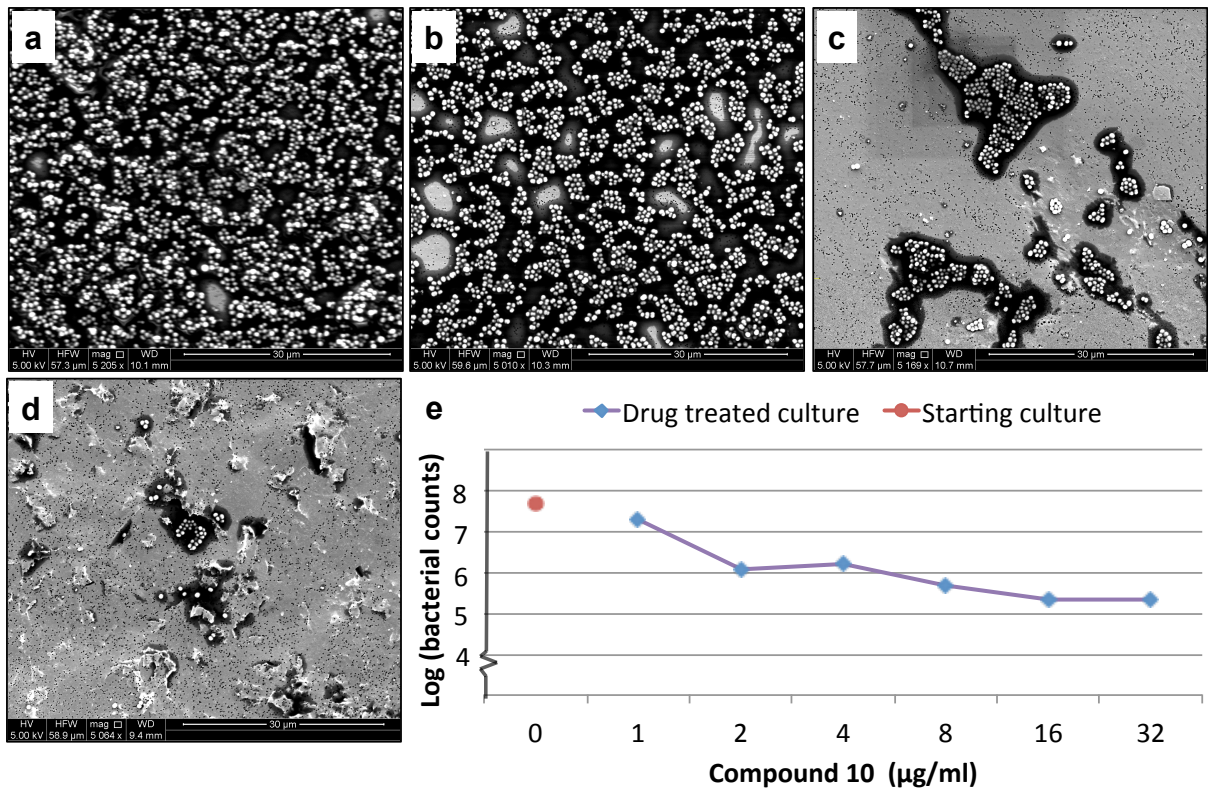

**Fig. S3** | SEM images of *S. aureus* (ATCC 29213) treated with **10** at (a) 0.5xMIC (0.5 µg/mL), (b) 1xMIC (1.0 µg/mL), (c) 2xMIC (2.0 µg/mL) and (d) 1xMBC (32.0 µg/mL). Images were taken at approximately x5000 magnification. Scale bar is 30 µm. (e) *In-vitro* efficacy of **10** against *S. aureus* showing a 2-fold decrease at 16-32 µg/mL compared to the starting culture. Untreated *S. aureus* and cultures treated with 0.5 µg/mL showed log (CFU/mL) > 9.

**Table S1 | Autodock parameters used**

| <b>Description</b>                                                  | <b>Value</b>         |
|---------------------------------------------------------------------|----------------------|
| Number of runs                                                      | 256                  |
| Number of points                                                    | 56 50 50             |
| Grid Centre                                                         | 4.0, -0.5353, 0.2711 |
| <b>Energy profile calculation</b>                                   |                      |
| Number of runs                                                      | 30                   |
| Number of points                                                    | 56 40 40             |
| <b>Common parameters for all dockings</b>                           |                      |
| tran0 (initial coordinates)                                         | random               |
| quat0 (initial quaternion)                                          | random               |
| ndihe (number of initial torsions)                                  | depends on ligand    |
| dihe0 (initial torsions)                                            | random               |
| non-hydrogen torsional coeff                                        | 0.3113               |
| tstep (translation step/Å)                                          | 2.0                  |
| qstep (quaternion step/deg)                                         | 50.0                 |
| dstep (torsion step/deg)                                            | 50.0                 |
| trnf (trans reduction factor/cycle)                                 | 1                    |
| quarf (quat reduction factor/cycle)                                 | 1                    |
| dihrf (tors reduction factor/cycle)                                 | 1                    |
| e0max (max. allowable initial energy, max. number of retries)       | 10000                |
| <b>Lamarckian Genetic Algorithm (LGA) parameters</b>                |                      |
| ga_pop_size (number of individuals in population)                   | 50                   |
| ga_num_evals (maximum number of energy evaluations)                 | 250000               |
| ga_num_generations (maximum number of generations)                  | 27000                |
| ga_elitism (num. of top individuals that automatically survive)     | 1                    |
| ga_mutation_rate (rate of gene mutation)                            | 0.02                 |
| ga_crossover_rate (rate of crossover)                               | 0.80                 |
| ga_window_size (num. of generations for picking worst individual)   | 10                   |
| ga_cauchy_alpha (~mean of Cauchy distribution for gene mutation)    | 0                    |
| ga_cauchy_beta (~variance of Cauchy distribution for gene mutation) | 1                    |

**Table S2 | Spatial dimensions of Eco-MscL versus spatial dimensions between  $\alpha$ ,  $\beta$  and  $\gamma$  hydrogen atoms in the ligands.** The distance between the H atoms are as follows  $\alpha$ - $\gamma$  >  $\beta$ - $\gamma$  >  $\alpha$ - $\beta$ .

|                                        | $\alpha$ - $\beta$ | $\beta$ - $\gamma$ | $\alpha$ - $\gamma$ | $\alpha$ $\beta$ $\gamma$ | $\beta$ $\alpha$ $\gamma$ | $\alpha$ $\gamma$ $\beta$ | Lowest Docking Energy (kcal/mol) |
|----------------------------------------|--------------------|--------------------|---------------------|---------------------------|---------------------------|---------------------------|----------------------------------|
|                                        | (Å)                |                    |                     | (Degrees)                 |                           |                           |                                  |
| <b>Spatial description of Eco-MscL</b> | 6.32               | 9.60               | 14.47               | 129.57                    | 20.37                     | 30.06                     |                                  |
| <b>Ligand</b>                          |                    |                    |                     |                           |                           |                           |                                  |
| <b>1</b>                               | 7.11               | 7.78               | 12.91               | 120.20                    | 31.39                     | 28.42                     | -9.89                            |
| <b>2</b>                               | 6.23               | 6.41               | 6.76                | 64.67                     | 59.00                     | 56.34                     | -10.43                           |
| <b>3</b>                               | 9.73               | 10.33              | 10.83               | 65.29                     | 60.02                     | 54.69                     | -5.96                            |
| <b>4</b>                               | 7.23               | 9.95               | 12.71               | 94.13                     | 51.31                     | 34.57                     | -8.40                            |
| <b>5</b>                               | 9.52               | 10.30              | 11.14               | 68.22                     | 59.22                     | 52.56                     | -8.21                            |
| <b>6</b>                               | 5.22               | 8.40               | 9.67                | 87.21                     | 60.16                     | 32.63                     | -7.56                            |
| <b>7</b>                               | 2.43               | 10.13              | 10.26               | 96.23                     | 80.13                     | 13.64                     | -7.62                            |
